# Supplementary material
Source: Springer Nature journal article supplement (https://www.springermedizin.de/resource/supplementary/13052_2014_380_MOESM1_ESM.pdf/9672006)

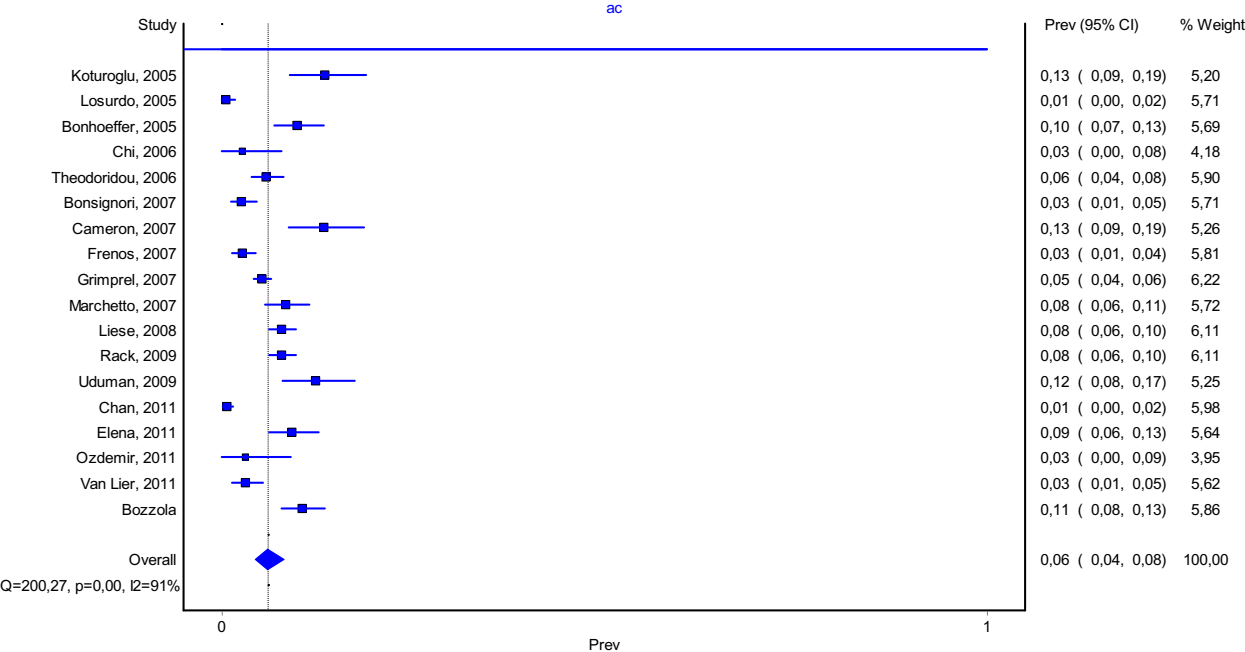

Supplement: MOESM1 [file 9672006]
